# Supplementary material for: Engineering cocrystal and polymorph architecture via pseudoseeding
Source: Royal Society of Chemistry journal article supplement (doi:10.1039/b820120j), 2009-01-01
Supplement: b820120j.pdf [file b820120j.pdf]

# Engineering cocrystal and polymorph architecture *via* pseudoseeding

Tomislav Friščić and Leonard R. MacGillivray\*  
Department of Chemistry  
University of Iowa  
Iowa City, IA 52223 (USA)

## Supplementary Information

|                                                                                                                                                                                                      | page |
|------------------------------------------------------------------------------------------------------------------------------------------------------------------------------------------------------|------|
| Figure S1 Optical image and <sup>1</sup> H NMR spectrum (solvent CD <sub>3</sub> OD) after 48 hours irradiation at 350 nm.                                                                           | S2   |
| Figure S2 Overlay of PXRD patterns for (res)(4,4'-bpeth) pseudoseed, photoactive and photostable polymorphs of (res)(4,4'-bpe), and simulated pattern for the photostable (res)(4,4'-bpe) polymorph. | S3   |

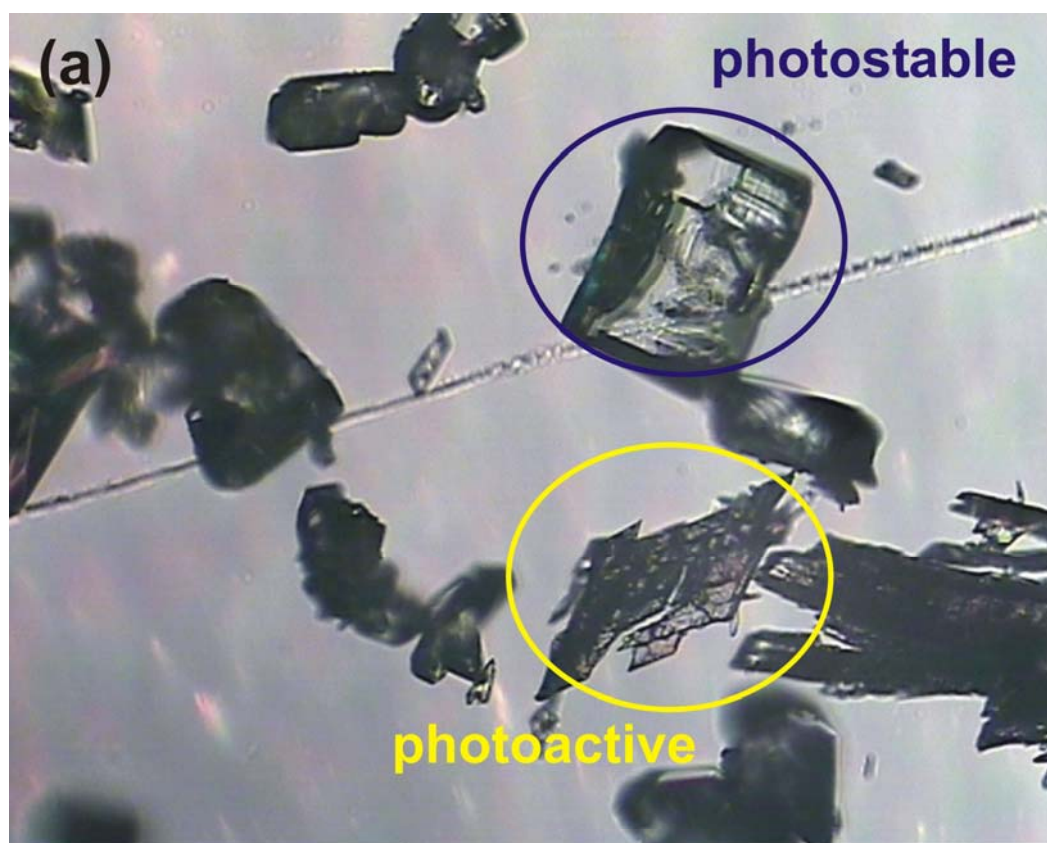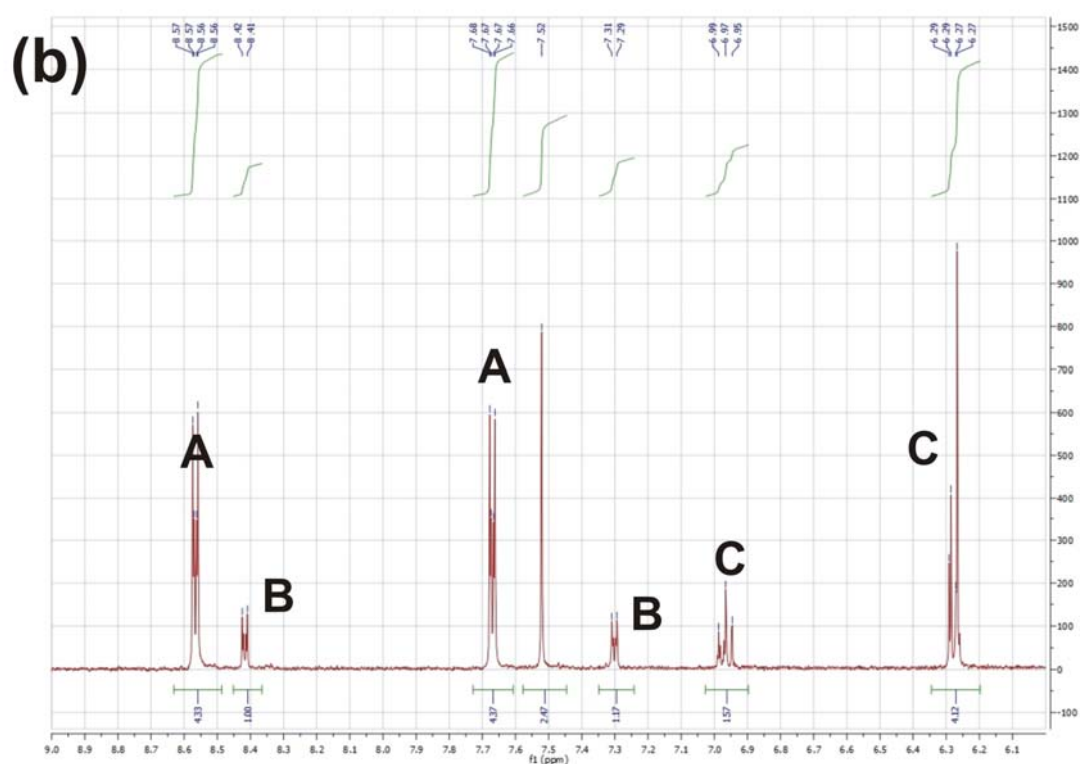

**Figure S1.** Optical image and  $^1\text{H}$  NMR spectrum (solvent  $\text{CD}_3\text{OD}$ ) of a sample of the photostable polymorph of (res).(4,4'-bpe) prepared by pseudoseeding after 48 hours irradiation at 350 nm. NMR signals labeled A, B and C correspond to pyridine group hydrogen atoms of bpe (in photostable polymorph), bpe photodimer (from impurities of the photoactive polymorph) and res, respectively. In this particular case, the peak integrations suggest 82-83% purity of the photostable polymorph.

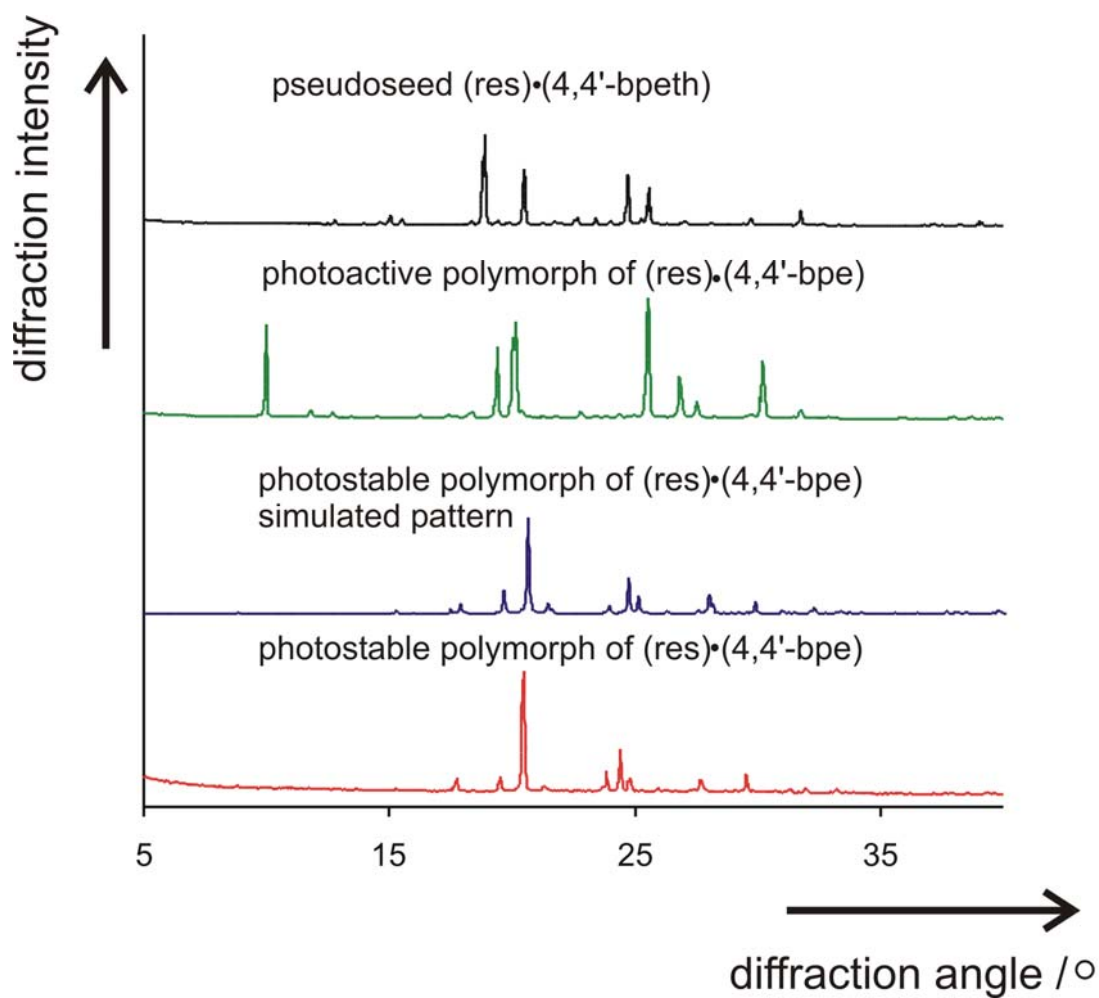

**Figure S2.** Overlay of measured PXRD patterns for the (res)(4,4'-bpeth) pseudoseed, photoactive, and photostable polymorphs of (res)(4,4'-bpe) and simulated pattern for the photostable (res)(4,4'-bpe) polymorph.
